# Supplementary material
Source: MDPI journal article supplement (https://www.mdpi.com/2071-1050/14/9/4919)
Supplement: s1 [file s1]

## Supplementary Materials Table S1

This appendix reports the form used to collect the metadata and the litter categories during the data collection process.

### Data form (NOAA method)

| Overview of survey location                   |               |  |                     |
|-----------------------------------------------|---------------|--|---------------------|
| Shoreline Debris<br>Debris density data sheet | Organization  |  |                     |
|                                               | Surveyor name |  |                     |
|                                               | Phone number  |  |                     |
|                                               | Date          |  | Date of this survey |

  

| Shoreline code (ID)                    |                |               | Unique code for a beach                                                                                                                  |
|----------------------------------------|----------------|---------------|------------------------------------------------------------------------------------------------------------------------------------------|
| Shoreline name                         |                |               | Name for section of shoreline (e.g, beach name, park)                                                                                    |
| Location                               |                |               | Ward, District, Province                                                                                                                 |
| Time start/end                         | Start          | End           |                                                                                                                                          |
| Coordinates of start of shoreline site | Longitude----- | Latitude----- | Record in both corners if width > 6m. If transect, record at water's edge.                                                               |
|                                        |                |               |                                                                                                                                          |
| Coordinates of end of shoreline site   | Longitude      | Latitude      | Record in both corners if width > 6m. If transect, record at back of shoreline.                                                          |
|                                        |                |               |                                                                                                                                          |
| Photo                                  |                |               | Photo ID                                                                                                                                 |
| Characteristics of shoreline           |                |               |                                                                                                                                          |
| Width of beach (100m)                  |                |               | Length measured along the midpoint of the coast (in meters)                                                                              |
| Substratum type                        |                |               | Sand, Gravel, Coral, ...                                                                                                                 |
| Substrate uniformity                   |                |               | Percent coverage of the main substrate type (%)                                                                                          |
| Tidal range                            |                |               | Maximum & Minimum vertical tidal range. Use tide chart (usually in feet)                                                                 |
| Tidal distance                         |                |               | Horizontal distance (in meters) from low – to high – tide line. Measure on beach at low and high tides or estimate based on wrack lines. |

|                                                                   |             |              |                                                                                             |
|-------------------------------------------------------------------|-------------|--------------|---------------------------------------------------------------------------------------------|
| Back of shoreline                                                 |             |              | Describe landward limit (e.g; vegetation, rock wall, cliff dunes, parking lot).             |
| Aspect                                                            |             |              | Direction you are facing when you look out at the water (e.g: northeast)                    |
| Location & land use                                               | Resident    | Not used yet |                                                                                             |
|                                                                   | Tourist     |              |                                                                                             |
|                                                                   | Agriculture |              |                                                                                             |
|                                                                   | Aquaculture |              |                                                                                             |
| Nearest town                                                      |             |              | Name of nearest town                                                                        |
| Nearest town distance                                             |             |              | Distance to nearest town (km)                                                               |
| Nearest town direction                                            |             |              | Direction to nearest town (cardinal direction)                                              |
| Nearest river name                                                |             |              | If applicable, name of nearest river or stream. If blank, assumed to mean no inputs nearby. |
| Nearest river distance                                            |             |              | (km)                                                                                        |
| Nearest river direction                                           |             |              | Direction to nearest river/stream                                                           |
| Rive/creek input to beach                                         | Yes         | No           | Whether nearest river/stream has an outlet within this shoreline section                    |
| Pipe or drain input                                               | Yes         | No           | If there is a storm drain or channelized outlet within shoreline section                    |
| Notes: (including description, landmarks, fishing activity, etc). |             |              |                                                                                             |

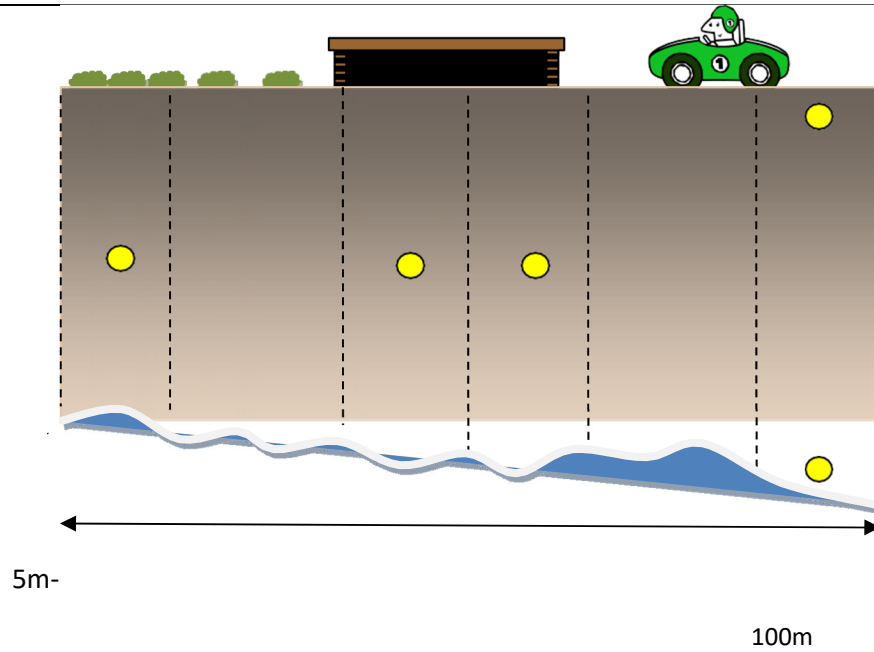

Figure. Example of a shoreline section (100 m) with yellow circles indicating marked GPS coordinates. Width determines location of GPS coordinates.

| #  | Transect | GPS | Characteristics |
|----|----------|-----|-----------------|
| 1  | 0-5 m    |     |                 |
| 2  | 5-10 m   |     |                 |
| 3  | 10-15 m  |     |                 |
| 4  | 15-20 m  |     |                 |
| 5  | 20-25 m  |     |                 |
| 6  | 25-30 m  |     |                 |
| 7  | 30-35 m  |     |                 |
| 8  | 35-40 m  |     |                 |
| 9  | 40-45 m  |     |                 |
| 10 | 45-50 m  |     |                 |
| 11 | 50-55 m  |     |                 |
| 12 | 55-60 m  |     |                 |
| 13 | 60-65 m  |     |                 |
| 14 | 65-70 m  |     |                 |
| 15 | 70-75 m  |     |                 |
| 16 | 75-80 m  |     |                 |

|    |          |  |  |
|----|----------|--|--|
| 17 | 80-85 m  |  |  |
| 18 | 85-90 m  |  |  |
| 19 | 90-95 m  |  |  |
| 20 | 95-100 m |  |  |

### PLASTIC CHARACTERISATION DATA SHEET

|                |       |     |                            |
|----------------|-------|-----|----------------------------|
| Shoreline name |       |     | Shoreline's local name     |
| Transect ID    |       |     |                            |
| Time           | Start | End |                            |
| Date           |       |     |                            |
| Mega plastic   | Yes   | No  |                            |
| Photo #        |       |     | Photo ID of plastic pieces |

| ID | Types                                                                                                      | Quantity | Weight |
|----|------------------------------------------------------------------------------------------------------------|----------|--------|
| P  | PLASTIC                                                                                                    |          |        |
| 1  | Hard plastic fragments                                                                                     |          |        |
| 2  | Soft plastic fragments                                                                                     |          |        |
| 3  | Film plastic fragments                                                                                     |          |        |
| 4  | Crisp/Sweet packages                                                                                       |          |        |
| 5  | Food wrappers                                                                                              |          |        |
| 6  | Other wrappers                                                                                             |          |        |
| 7  | Beverage bottles (PET) size 1 (0 – 100 ml)                                                                 |          |        |
| 8  | Beverage bottles (PET) size 2 (> 100 ml)                                                                   |          |        |
| 9  | Other Beverage bottles (HDPE other plastic, etc.)                                                          |          |        |
| 10 | Container bottles                                                                                          |          |        |
| 11 | Cleaner and cosmetic bottles (e.g: shampoo bottles, cosmetic jars, shower gel bottle – Size 1 (0 – 100 ml) |          |        |
| 12 | Cleaner and cosmetic bottles (e.g: shampoo bottles, cosmetic jars, shower gel bottle – Size 2 (> 100 ml)   |          |        |
| 13 | Bottle caps or lids (HDPE)                                                                                 |          |        |

| ID | Types                                                                                         | Quantity | Weight |
|----|-----------------------------------------------------------------------------------------------|----------|--------|
| 14 | Cigarette butts                                                                               |          |        |
| 15 | Lighter                                                                                       |          |        |
| 16 | Plastic bags size 1 (0 – 5 kg)                                                                |          |        |
| 17 | Plastic bags size 2 (> 5 kg)                                                                  |          |        |
| 18 | Styrofoam food containers                                                                     |          |        |
| 19 | Single use plastic products (Cups, Utensils,...) (PET)                                        |          |        |
| 20 | Single use plastic products (Cups and cutlery e.g knives, forks, spoons, etc.) (PP)           |          |        |
| 21 | Straws                                                                                        |          |        |
| 22 | Fertilizer bags or containers                                                                 |          |        |
| 23 | Plastic strings, cords and ropes                                                              |          |        |
| 24 | Personal hygiene products                                                                     |          |        |
| 25 | Medical products                                                                              |          |        |
| 26 | Fishing gear 1: Fishing plastic ropes, net pieces, fishing lures & lines, hard plastic floats |          |        |
| 27 | Fishing gear 2: Styrofoam, Buoys & Floats                                                     |          |        |
| 28 | Other plastic                                                                                 |          |        |
|    |                                                                                               |          |        |
|    |                                                                                               |          |        |
| M  | Metal                                                                                         |          |        |
| G  | Glass                                                                                         |          |        |
| R  | Rubber                                                                                        |          |        |
| P  | Paper                                                                                         |          |        |
| C  | Cloth/fabric                                                                                  |          |        |
| O  | Mixed waste                                                                                   |          |        |
|    |                                                                                               |          |        |
|    |                                                                                               |          |        |
| L  | Other litter                                                                                  |          |        |
|    |                                                                                               |          |        |
|    |                                                                                               |          |        |
|    |                                                                                               |          |        |
|    |                                                                                               |          |        |

## Supplementary Materials Table S2

Macro marine litter classification for Vietnamese coast. Empty spaces represent zero values

|                               | HP_<br>C1 | HP_<br>C2 | H_<br>C1 | DN_<br>C1 | DN_<br>C2 | QN_<br>C1 | NT_C<br>1_n1 | CR_<br>C1 | CR_<br>C2 | HCM_<br>C1 | ST_<br>C1 | ST_<br>C2 | PQ_<br>C1 | PQ_<br>C2 |
|-------------------------------|-----------|-----------|----------|-----------|-----------|-----------|--------------|-----------|-----------|------------|-----------|-----------|-----------|-----------|
| Hard plastic fragments        | 48        | 20        | 460      | 36        | 12        | 99        | 20           | 16        | 29        | 233        | 7         | 230       | 29        | 81        |
| Soft plastic fragments        | 49        |           | 278      | 50        | 32        | 468       | 34           | 715       | 403       | 39         | 59        | 1443      | 108       | 72        |
| Film plastic fragments        | 3         |           |          | 1         | 14        |           |              |           |           |            |           | 66        |           |           |
| Crisp/Sweet packages          | 49        | 12        | 98       | 13        | 10        | 69        | 17           | 77        | 91        | 36         |           | 42        | 51        | 17        |
| Food wrappers                 | 22        | 8         | 49       | 2         | 1         | 178       | 3            | 11        | 23        | 9          | 7         | 69        | 112       | 37        |
| Other wrappers                | 15        | 25        | 15       | 13        | 12        | 71        | 7            | 4         | 13        | 86         | 3         | 116       | 60        | 6         |
| Beverage bottles (PET) size 1 | 7         |           | 6        | 5         | 6         |           |              | 7         | 4         |            |           | 3         | 4         |           |
| Beverage bottles (PET) size 2 |           |           |          | 3         |           |           |              |           | 1         | 1          |           |           |           |           |
| Other Beverage bottles        | 6         | 2         |          | 1         |           |           |              |           | 3         |            |           |           | 6         |           |
| Containers bottles            |           |           |          | 2         |           |           | 1            |           | 2         |            |           | 1         |           |           |
| Cleaner and cosmetics bottles |           |           |          |           |           |           | 1            | 1         | 1         | 4          |           |           | 1         | 2         |

size 1

Cleaner  
and  
cosmetic  
s bottles  
size 2

|                                  |     |    |     |     |    |     |     |    |     |     |    |    |     |    |
|----------------------------------|-----|----|-----|-----|----|-----|-----|----|-----|-----|----|----|-----|----|
| Bottle caps                      | 12  | 9  | 44  | 18  | 3  | 46  |     | 12 | 50  | 48  |    | 4  | 23  | 44 |
| Cigarette butts                  | 14  | 3  | 1   | 46  | 15 |     | 9   | 1  | 1   | 38  |    |    | 2   | 61 |
| Lighters                         | 4   | 2  | 12  | 4   |    | 23  |     | 2  | 20  | 16  |    | 2  | 3   | 6  |
| Plastic bags size 1 (0-5kg)      | 257 | 56 | 171 | 7   | 16 | 248 | 1   | 65 | 192 | 109 | 1  | 99 | 194 | 64 |
| Plastic bags size 2 (>5kg)       |     |    | 9   |     | 2  | 3   |     | 67 | 381 | 16  |    | 13 | 8   | 3  |
| Styrofoam food containers        | 28  | 4  | 27  | 163 | 15 | 19  | 126 | 18 | 5   | 680 | 39 | 68 | 161 | 62 |
| Cups, Utensils, .. (PET)         | 2   | 3  | 107 | 8   | 13 | 102 | 5   | 23 | 56  |     | 1  | 36 | 45  | 1  |
| Cups, Utensils, ..(PP)           | 26  | 5  | 31  |     | 2  | 37  |     | 3  | 8   | 69  |    | 1  | 77  | 39 |
| Straws                           | 16  | 2  | 509 | 18  | 9  | 160 | 14  | 12 | 51  | 50  | 1  | 3  | 143 | 35 |
| Fertilizer bags or containers    |     | 6  | 3   |     | 1  | 16  |     | 42 | 44  | 13  | 13 | 34 | 9   | 5  |
| Plastic strings, cords and ropes | 52  | 55 | 33  | 5   | 12 | 74  | 10  | 7  | 81  | 32  |    | 53 | 32  | 53 |
| Personal hygiene products        | 9   | 2  | 4   | 3   | 2  | 3   | 5   | 2  | 3   | 11  | 1  | 8  | 1   | 11 |
| Medical                          | 8   | 3  | 12  | 2   | 3  | 7   | 2   | 16 | 17  | 29  |    | 33 | 1   | 5  |

products

|                 |     |    |     |     |    |     |    |     |     |     |    |     |     |     |
|-----------------|-----|----|-----|-----|----|-----|----|-----|-----|-----|----|-----|-----|-----|
| Fishing gear 1: | 125 | 55 | 772 | 13  | 24 | 142 | 2  | 890 | 160 | 965 | 3  | 119 | 434 | 136 |
| Fishing gear 2: | 289 | 97 | 62  | 465 | 10 | 677 | 54 | 14  | 13  | 179 | 95 | 512 | 402 | 40  |
| Other plastics  | 16  | 23 | 117 | 5   | 21 | 230 | 20 | 30  | 19  | 53  | 4  | 5   | 36  | 7   |
| Metal           | 53  | 21 | 6   | 1   | 2  | 3   |    |     |     | 6   | 1  | 8   | 15  | 14  |
| Glass           | 2   | 10 | 16  | 1   |    | 33  |    |     |     | 8   | 4  | 5   | 21  | 7   |
| Rubber          | 17  | 4  | 2   | 1   | 2  | 1   | 7  |     |     | 20  | 2  | 5   | 2   | 42  |
| Paper/wood      | 3   | 1  |     |     | 4  |     |    |     |     | 19  |    |     |     | 42  |
| Textile         | 24  | 2  |     | 2   | 4  | 7   |    |     |     | 28  | 4  | 124 | 1   | 14  |
| Other litter    | 35  | 40 | 3   | 7   | 2  | 5   | 3  |     |     | 35  | 1  | 5   |     | 22  |

---



### Supplementary Materials Table S3

Top 10 items for each survey with number of items collected and its percentage over the total amount of litter items collected during the survey

| Hai Phong – Bai Ben Pha Got (HP_C1)                                                          |        | Hai Phong – Bai Do Son (HP_C2)                                                               |        |
|----------------------------------------------------------------------------------------------|--------|----------------------------------------------------------------------------------------------|--------|
| Fishing gear 2: Polystyrenes – EPS, buoys & floats                                           | 24.27% | Fishing gear 2: Polystyrenes – EPS, buoys & floats                                           | 20.64% |
| Plastic bags size 1 (0-5kg)                                                                  | 21.58% | Plastic bags size 1 (0-5kg)                                                                  | 11.91% |
| Fishing gear 1: Fishing plastic rope, net pieces, fishing lures & lines, hard plastic floats | 10.50% | Plastic strings, cords and ropes                                                             | 11.70% |
| Metal                                                                                        | 4.45%  | Fishing gear 1: Fishing plastic rope, net pieces, fishing lures & lines, hard plastic floats | 11.70% |
| Plastic strings, cords and ropes                                                             | 4.37%  | Other litter                                                                                 | 8.51%  |
| Soft plastic fragments (mostly from plastic bag fragments)                                   | 4.11%  | Other wrappers (Wet tissue wrapper, chopstick wrapper, etc.)                                 | 5.32%  |
| Crisp/Sweet packages                                                                         | 4.11%  | Other plastics (slippers, sanitary products, diaper, etc.)                                   | 4.89%  |
| Hard plastic fragments (from plastic toy, kitchenware, unidentified objects)                 | 4.03%  | Metal                                                                                        | 4.47%  |
| Other litter                                                                                 | 2.94%  | Hard plastic fragments (from plastic toy, kitchenware, unidentified objects)                 | 4.26%  |
| Styrofoam food containers                                                                    | 2.35%  | Crisp/Sweet packages                                                                         | 2.55%  |

| Hue – Bien Thuan An (H_C1)                                                                   |        | Da Nang – Bai Bien Nam O (DN_C1)                                                             |        |
|----------------------------------------------------------------------------------------------|--------|----------------------------------------------------------------------------------------------|--------|
| Fishing gear 1: Fishing plastic rope, net pieces, fishing lures & lines, hard plastic floats | 27.10% | Fishing gear 2: Polystyrenes – EPS, buoys & floats                                           | 52.13% |
| Straws                                                                                       | 17.87% | Styrofoam food containers                                                                    | 18.27% |
| Hard plastic fragments (from plastic toy, kitchenware, unidentified objects)                 | 16.15% | Soft plastic fragments (mostly from plastic bag fragments)                                   | 5.61%  |
| Soft plastic fragments (mostly from plastic bag fragments)                                   | 9.76%  | Cigarette butts                                                                              | 5.16%  |
| Plastic bags size 1 (0-5kg)                                                                  | 6.00%  | Hard plastic fragments (from plastic toy, kitchenware, unidentified objects)                 | 4.04%  |
| Other plastics (slippers, sanitary products, diaper, etc.)                                   | 4.11%  | Bottle caps (HDPE)                                                                           | 2.02%  |
| Cups, Utensils, ect. (PET)                                                                   | 3.76%  | Straws                                                                                       | 1.68%  |
| Crisp/Sweet packages                                                                         | 3.44%  | Crisp/Sweet packages                                                                         | 1.46%  |
| Fishing gear 2: Polystyrenes – EPS, buoys & floats                                           | 2.18%  | Other wrappers (Wet tissue wrapper, chopstick wrapper, etc.)                                 | 1.46%  |
| Food wrappers                                                                                | 1.72%  | Fishing gear 1: Fishing plastic rope, net pieces, fishing lures & lines, hard plastic floats | 1.46%  |

| Da Nang – Bai Bien Dong (DN_C2)                                                              |        | Quang Nam – Bien Rang (QN_C1)                              |        |
|----------------------------------------------------------------------------------------------|--------|------------------------------------------------------------|--------|
| Soft plastic fragments (mostly from plastic bag fragments)                                   | 12.85% | Fishing gear 2: Polystyrenes – EPS, buoys & floats         | 24.87% |
| Fishing gear 1: Fishing plastic rope, net pieces, fishing lures & lines, hard plastic floats | 9.64%  | Soft plastic fragments (mostly from plastic bag fragments) | 17.19% |
| Other plastics (slippers, sanitary products, diaper, etc.)                                   | 8.43%  | Plastic bags size 1 (0-5kg)                                | 9.11%  |
| Plastic bags size 1 (0-5kg)                                                                  | 6.43%  | Other plastics (slippers, sanitary products, diaper, etc.) | 8.45%  |
|                                                                                              |        | Food wrappers                                              | 6.54%  |

|                                                                              |       |                                                                                              |       |
|------------------------------------------------------------------------------|-------|----------------------------------------------------------------------------------------------|-------|
| Cigarette butts                                                              | 6.02% | Straws                                                                                       | 5.88% |
| Styrofoam food containers                                                    | 6.02% | Fishing gear 1: Fishing plastic rope, net pieces, fishing lures & lines, hard plastic floats | 5.22% |
| Film plastic fragments                                                       | 5.62% | Cups, Utensils, etc. (PET)                                                                   | 3.75% |
| Cups, Utensils, etc. (PET)                                                   | 5.22% | Hard plastic fragments (from plastic toy, kitchenware, unidentified objects)                 | 3.64% |
| Hard plastic fragments (from plastic toy, kitchenware, unidentified objects) | 4.82% | Plastic strings, cords and ropes                                                             | 2.72% |
| Other wrappers (Wet tissue wrapper, chopstick wrapper, etc.)                 | 4.82% |                                                                                              |       |

| Nha Trang – Bien Vinh Nguyen (NT_C1)                                         |        | Cam Ranh – Bien My Ca (CR_C1)                                                                |        |
|------------------------------------------------------------------------------|--------|----------------------------------------------------------------------------------------------|--------|
| Styrofoam food containers                                                    | 36.95% | Fishing gear 1: Fishing plastic rope, net pieces, fishing lures & lines, hard plastic floats | 40.18% |
| Fishing gear 2: Polystyrenes – EPS, buoys & floats                           | 15.84% | Soft plastic fragments (mostly from plastic bag fragments)                                   | 32.28% |
| Soft plastic fragments (mostly from plastic bag fragments)                   | 9.97%  | Crisp/Sweet packages                                                                         | 3.48%  |
| Hard plastic fragments (from plastic toy, kitchenware, unidentified objects) | 5.87%  | Plastic bags size 2 (>5kg)                                                                   | 3.21%  |
| Other plastics (slippers, sanitary products, diaper, etc.)                   | 5.87%  | Plastic bags size 1 (0-5kg)                                                                  | 3.02%  |
| Crisp/Sweet packages                                                         | 4.99%  | Fertilizer bags or containers                                                                | 2.93%  |
| Straws                                                                       | 4.11%  | Other plastics (slippers, sanitary products, diaper, etc.)                                   | 2.39%  |
| Plastic strings, cords and ropes                                             | 2.93%  | Cups, Utensils, etc. (PET)                                                                   | 1.90%  |
| Cigarette butts                                                              | 2.64%  | Styrofoam food containers                                                                    | 1.35%  |
| Other wrappers (Wet tissue wrapper, chopstick wrapper, etc.)                 | 2.05%  | Hard plastic fragments (from plastic toy, kitchenware, unidentified objects)                 | 1.04%  |

| Cam Ranh – Bien Binh Lap (CR_C2)                                                             |        | Ho Chi Minh – Bien 30/4 (HCM_C1)                                                             |        |
|----------------------------------------------------------------------------------------------|--------|----------------------------------------------------------------------------------------------|--------|
| Soft plastic fragments (mostly from plastic bag fragments)                                   | 23.39% | Fishing gear 1: Fishing plastic rope, net pieces, fishing lures & lines, hard plastic floats | 34.07% |
| Plastic bags size 2 (>5kg)                                                                   | 22.11% | Styrofoam food containers                                                                    | 24.01% |
| Plastic bags size 1 (0-5kg)                                                                  | 11.14% | Hard plastic fragments (from plastic toy, kitchenware, unidentified objects)                 |        |
| Fishing gear 1: Fishing plastic rope, net pieces, fishing lures & lines, hard plastic floats | 9.29%  | Fishing gear 2: Polystyrenes – EPS, buoys & floats                                           | 8.23%  |
| Crisp/Sweet packages                                                                         | 5.28%  | Plastic bags size 1 (0-5kg)                                                                  | 6.32%  |
| Plastic strings, cords and ropes                                                             | 4.70%  | Other wrappers (Wet tissue wrapper, chopstick wrapper, etc.)                                 | 3.85%  |
| Cups, Utensils, etc. (PET)                                                                   | 3.25%  | Cups, Utensils, etc. (PP)                                                                    | 3.04%  |
| Straws                                                                                       | 2.96%  | Other plastics (slippers, sanitary products, diaper, etc.)                                   | 1.87%  |
| Bottle caps (HDPE)                                                                           | 2.90%  | Straws                                                                                       | 1.77%  |
| Fertilizer bags or containers                                                                | 2.55%  | Bottle caps (HDPE)                                                                           | 1.69%  |

| Soc Trang – Bien Ho Be (ST_C1)                             |        | Soc Trang – Bien Lai Hoa (ST_C2)                           |        |
|------------------------------------------------------------|--------|------------------------------------------------------------|--------|
| Fishing gear 2: Polystyrenes – EPS, buoys & floats         | 38.31% | Soft plastic fragments (mostly from plastic bag fragments) | 46.38% |
| Soft plastic fragments (mostly from plastic bag fragments) | 23.79% | Fishing gear 2: Polystyrenes – EPS, buoys & floats         | 16.46% |

|                                                                              |        |                                                                                              |       |
|------------------------------------------------------------------------------|--------|----------------------------------------------------------------------------------------------|-------|
| Styrofoam food containers                                                    | 15.73% | Hard plastic fragments (from plastic toy, kitchenware, unidentified objects)                 | 7.39% |
| Fertilizer bags or containers                                                | 5.24%  | Textile                                                                                      | 3.99% |
| Hard plastic fragments (from plastic toy, kitchenware, unidentified objects) | 2.82%  | Fishing gear 1: Fishing plastic rope, net pieces, fishing lures & lines, hard plastic floats | 3.83% |
| Food wrappers                                                                | 2.82%  | Other wrappers (Wet tissue wrapper, chopstick wrapper, etc.)                                 | 3.73% |
| Other plastics (slippers, sanitary products, diaper, etc.)                   | 1.61%  | Plastic bags size 1 (0-5kg)                                                                  | 3.18% |
| Glass                                                                        | 1.61%  | Food wrappers                                                                                | 2.22% |
| Textile                                                                      | 1.61%  | Styrofoam food containers                                                                    | 2.19% |
| Other wrappers (Wet tissue wrapper, chopstick wrapper, etc.)                 | 1.21%  | Film plastic fragments                                                                       | 2.12% |

| Phu Quoc – Bai Truong (PQ_C1)                                                                |        | Phu Quoc – Bai Sao (PQ_C2)                                                                   |        |
|----------------------------------------------------------------------------------------------|--------|----------------------------------------------------------------------------------------------|--------|
| Fishing gear 1: Fishing plastic rope, net pieces, fishing lures & lines, hard plastic floats | 21.89% | Fishing gear 1: Fishing plastic rope, net pieces, fishing lures & lines, hard plastic floats | 14.66% |
| Fishing gear 2: Polystyrenes – EPS, buoys & floats                                           | 20.27% | Hard plastic fragments (from plastic toy, kitchenware, unidentified objects)                 | 8.73%  |
| Plastic bags size 1 (0-5kg)                                                                  | 9.78%  | Soft plastic fragments (mostly from plastic bag fragments)                                   | 7.76%  |
| Styrofoam food containers                                                                    | 8.12%  | Plastic bags size 1 (0-5kg)                                                                  | 6.90%  |
| Straws                                                                                       | 7.21%  | Styrofoam food containers                                                                    | 6.68%  |
| Food wrappers                                                                                | 5.65%  | Cigarette butts                                                                              | 6.57%  |
| Soft plastic fragments (mostly from plastic bag fragments)                                   | 5.45%  | Plastic strings, cords and ropes                                                             | 5.71%  |
| Cups, Utensils, etc. (PP)                                                                    | 3.88%  | Bottle caps (HDPE)                                                                           | 4.74%  |
| Other wrappers (Wet tissue wrapper, chopstick wrapper, etc.)                                 | 3.03%  | Rubber                                                                                       | 4.53%  |
| Crisp/Sweet packages                                                                         | 2.57%  | Paper/wood                                                                                   | 4.53%  |
